# Supplementary material
Source: PubMed Central journal article supplement (PMC3511071)
Supplement: 1217338109_pnas.201217338SI.pdf [file 1217338109_pnas.201217338SI.pdf]

# Supporting Information

Brown et al. 10.1073/pnas.1217338109

## SI Materials and Methods

**$\beta$ -Globin Reporter Assays.** HEK293T cells were grown in Dulbecco's modified Eagle medium (Life Technologies) supplemented with 10% FBS (vol/vol), 2 mM L-glutamine, and 1 $\times$  penicillin streptomycin solution. Transfections were performed using TransIT-293 (Mirus) per the manufacturer's protocol. Cells were harvested 24–48 h after transfection, and RNA was isolated using TRIzol (Life Technologies). Ten micrograms of total RNA was loaded onto a 1.2% agarose (wt/vol)/6.5% formaldehyde (vol/vol) gel, resolved overnight at 70 V, and transferred to a Zeta-Probe GT blotting membrane (Bio-Rad) via upward capillary transfer with 20 $\times$  SSC. Three DNA oligonucleotides (Integrated DNA Technologies) were 5'-[<sup>32</sup>P]-labeled to detect NeoR mRNA (5'-GCATCAGAGCAGCCGATGTCTGTTG-3', 5'-GCATCAGCCATGATG-GATACTTTCTCGG-3', and 5'-CGGCCATTTTCCACCATG-ATATTCGGCAAGC-3') and a uniformly [<sup>32</sup>P]-labeled antisense RNA probe was used to detect  $\beta$ -globin mRNA. To calculate the level of  $\beta$ -globin mRNA accumulation, the  $\beta$ -globin signal was divided by the signal for the NeoR mRNA, which served as a loading and transfection control because it is encoded on the same plasmid as the  $\beta$ -globin reporter. Then, all values were normalized relative to  $\beta\Delta 1,2$  lacking an insert, which was set at an arbitrary value of 1, and mutants were normalized relative to the appropriate WT counterpart.

**RNA Preparation.** RNA oligonucleotides A<sub>9</sub>GCA<sub>4</sub>, CAG<sub>2</sub>A<sub>5</sub>GCA<sub>4</sub>, and A<sub>15</sub> (Dharmacon) were deprotected and dried according to the manufacturer's instructions and resuspended in ddH<sub>2</sub>O. For gel-shift assays, the metastasis-associated lung adenocarcinoma transcript 1 (MALAT1) (nucleotides 8263–8328) and multiple endocrine neoplasia- $\beta$  (MEN $\beta$ ) (nucleotides 22649–22710) expression and nuclear retention elements (ENEs) were transcribed by his-tagged T7 RNA polymerase using a PCR-generated template, and the RNA product was processed as described previously (1), except the RNA was resuspended in ddH<sub>2</sub>O and aliquoted before storage. To enhance transcription, the template was altered to start with GG. For UV melting studies, the RNA was transcribed and processed as described above except DraI-linearized pHDV plasmids served as templates.

**Gel-Shift Assays.** RNA oligonucleotides were 5'-[<sup>32</sup>P]-labeled using  $\gamma$ -[<sup>32</sup>P]ATP (PerkinElmer) and T4 PNK (New England Biolabs) per the manufacturer's protocol. Free  $\gamma$ -[<sup>32</sup>P]ATP was removed by passing the reaction mixture through a Microspin G-25 column (GE Healthcare). Increasing concentrations of the ENE were titrated into the equilibration solution, which contained 25 mM

sodium cacodylate pH 7, 50 mM KCl, 1 mM MgCl<sub>2</sub>, 0.5 mg/mL yeast tRNA, 10% glycerol (vol/vol), and 2 nM 5'-[<sup>32</sup>P]-labeled oligonucleotide. The mixture was heated at 95 °C for 3 min, snap-cooled on ice for 10 min, and allowed to equilibrate at room temperature for 1 h. Then, the binding reaction was resolved on an 8% native (vol/vol) Tris-acetate gel with 1 mM MgCl<sub>2</sub> in the gel and running buffer. After electrophoresis for 1.5–2 h at 150 V and room temperature, the gels were dried, exposed to a phosphorimager screen overnight, and scanned using a Storm 860 (GE Healthcare).

## SI Discussion

For the data presented in Fig. 1C, it was somewhat surprising that the  $\beta\Delta 1,2$ -MALAT1/MEN $\beta$  ENE+A reporters (Fig. 1C, lanes 5 and 15) did not exhibit stabilization activity despite the presence of a transcript having an ENE and an A-rich tract that contains GC, both of which were shown to be important from the assays presented in Fig. 3. However, transcript stabilization occurs when mascRNA or menRNA are added to  $\beta\Delta 1,2$ -MALAT1/MEN $\beta$  ENE+A, raising the question: What are the roles of RNase P and the tRNA-like sequences in transcript stabilization? Although we do not fully understand the relationship between stabilization activity in vivo and the presence of mascRNA or menRNA inducing transcript cleavage by RNase P, it is clearly important to have a 3' blunt-ended triplex without unpaired nucleotides at the duplex-triplex junction as shown in Fig. 3B. The uncleaved transcripts of  $\beta\Delta 1,2$ -MALAT1 ENE+A or  $\beta\Delta 1,2$ -MEN $\beta$  ENE+A (Fig. 1C, lanes 5 and 15) would have nucleotide overhangs at the 3' end, which could create a binding site for an exonucleolytic enzyme to initiate degradation of the transcript. However, our results do not exclude RNase P from having a possible role in stabilization activity, such as chaperone-like activity to assist with formation of an ENE-like structure. To determine if having a free 3' end is important for stabilization activity independent of RNase P cleavage, we have engineered and tested  $\beta\Delta 1,2$  reporters with alternative 3'-end processing mechanisms, whereby the tRNA-like structure was replaced with a *cis*-acting ribozyme (HDV or hammerhead). None of these mutant constructs exhibited stabilization activity, so it remains unclear whether such negative results are because of inefficient processing or the absence of RNase P. Another possibility, which we have not investigated, is that the mascRNA or menRNA structure facilitates the folding of an ENE-like structure. Additional studies are needed to address these important mechanistic questions.

1. Mitton-Fry RM, DeGregorio SJ, Wang J, Steitz TA, Steitz JA (2010) Poly(A) tail recognition by a viral RNA element through assembly of a triple helix. *Science* 330(6008):1244–1247.

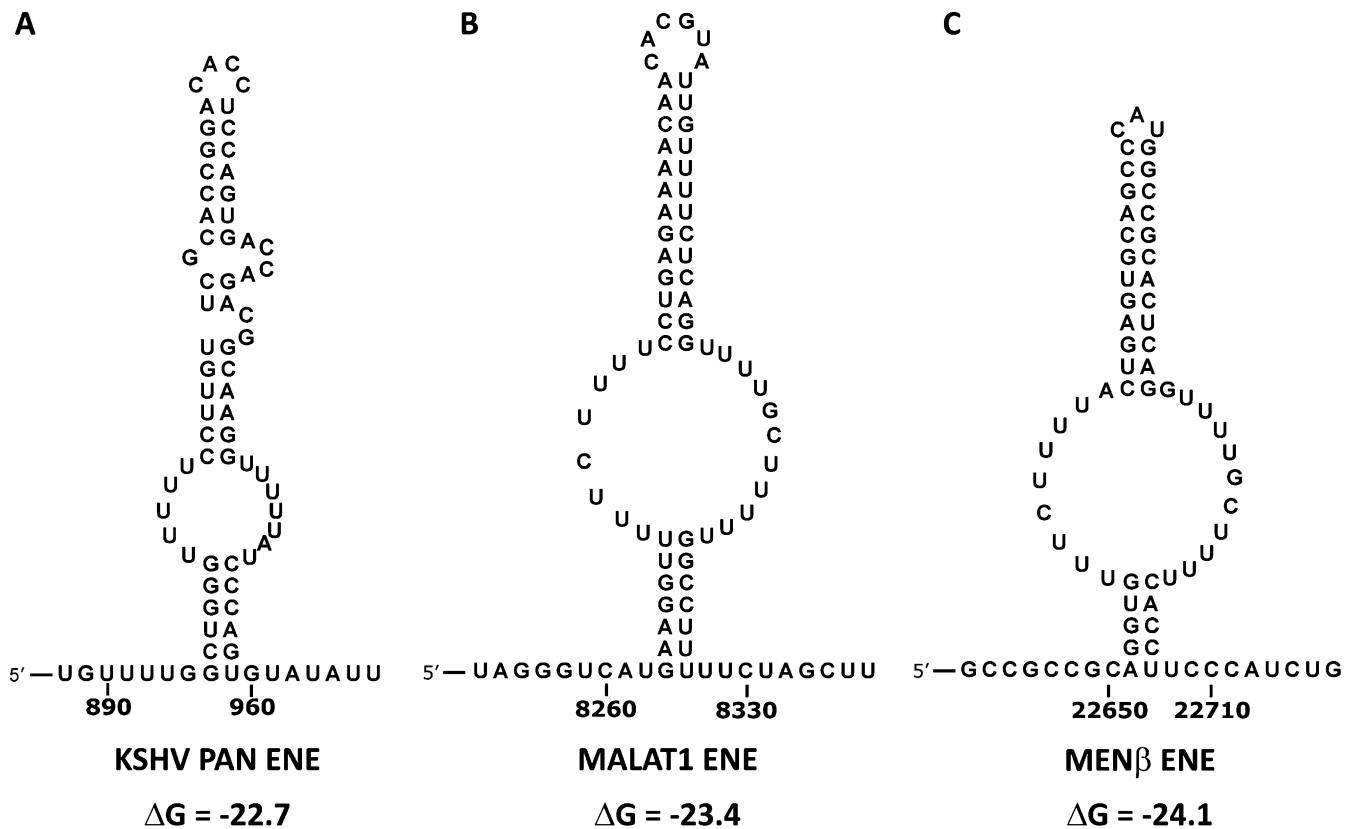

**Fig. S1.** Secondary structure predictions using Mfold. Predicted secondary structures are shown for (A) Kaposi's sarcoma-associated herpesvirus (KSHV) polyadenylated nuclear (PAN) ENE, (B) putative MALAT1 ENE, and (C) putative MEN $\beta$  ENE, all of which are the same sequences inserted into the  $\beta\Delta 1,2$  reporter constructs. The  $\Delta G$  values are in units of kilocalorie per mole from the Mfold program (1) and exclude the unpaired 5'- and 3'-flanking sequences beneath the lower stem.

1. Zuker M (2003) Mfold web server for nucleic acid folding and hybridization prediction. *Nucleic Acids Res* 31(13):3406–3415.

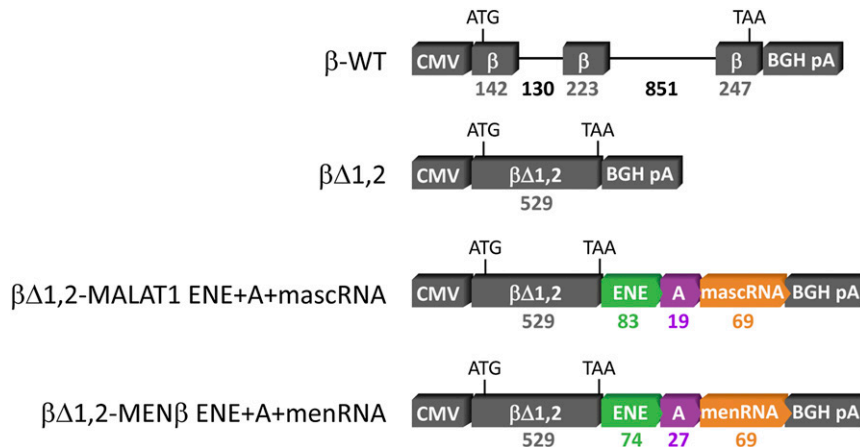

**Fig. S2.** Detailed schematics of select  $\beta$ -globin reporter plasmids. In the pcDNA3 vector (Invitrogen), all  $\beta$ -globin sequences ( $\beta$ ) are flanked by a human CMV immediate-early promoter at the 5' end and a bovine growth hormone polyadenylation signal (BGH pA) at the 3' end. Both the  $\beta$ -WT (with introns) and  $\beta\Delta 1,2$  (intronless) reporter plasmids have been described previously (1, 2). Briefly, the  $\beta$ -WT reporter contains two introns (black lines) and three exons (boxes). PCR inserts of the MALAT1 and MEN $\beta$  sequences were inserted into the 3' UTR at the *Apal* site, which is located 137 nts upstream from the BGH pA signal of AATAAAA. Insert sizes for MALAT1 are as follows: 83 nts for the predicted ENE (Fig. S1B), 19 nts for the A-rich tract, and 69 nts for mascRNA. Insert sizes for MEN $\beta$  are as follows: 74 nts for the predicted ENE (Fig. S1C), 27 nts for the A-rich tract, and 69 nts for menRNA. Note, the  $\beta\Delta 1,2$  constructs have a Flag-tag at the N terminus (not shown) and encode the Neomycin resistance gene (not shown), the transcript of which served as a transfection and loading control. Boxes and lines are not drawn to scale.

- Lykke-Andersen J, Shu MD, Steitz JA (2000) Human Upf proteins target an mRNA for nonsense-mediated decay when bound downstream of a termination codon. *Cell* 103(7):1121–1131.
- Conrad NK, Steitz JA (2005) A Kaposi's sarcoma virus RNA element that increases the nuclear abundance of intronless transcripts. *EMBO J* 24(10):1831–1841.
